# Supplementary material for: Rifabutin Suppresses Inducible Clarithromycin Resistance in Mycobacterium abscessus by Blocking Induction of whiB7 and erm41
Source: PubMed Central journal article supplement (PMC7168051; doi:10.3390/antibiotics9020072), 2020-02-10
Supplement: antibiotics-09-00072-s001.pdf [file antibiotics-09-00072-s001.pdf]

**Table S1:** Detailed MIC<sub>90</sub> values (in  $\mu\text{M}$ ) of checkerboard assay results for the combination of Clarithromycin and Rifabutin against three reference strains and a collection of clinical isolates of *M. abscessus*.

| Isolate code | CLR + |      | Alone                 |                       | In combination        |                       |
|--------------|-------|------|-----------------------|-----------------------|-----------------------|-----------------------|
|              | RFB   | FICI | CLR ( $\mu\text{M}$ ) | RFB ( $\mu\text{M}$ ) | CLR ( $\mu\text{M}$ ) | RFB ( $\mu\text{M}$ ) |
| ATCC 19977   | S     | 0.26 | 6                     | 3                     | 0.78                  | 0.39                  |
| Bamboo       | I     | 0.56 | 0.5                   | 1.5                   | 0.15                  | 0.39                  |
| M9           | S     | 0.39 | 3                     | 3                     | 0.78                  | 0.39                  |
| M199         | S     | 0.39 | 12                    | 3                     | 1.56                  | 0.78                  |
| M337         | S     | 0.39 | 12                    | 3                     | 1.56                  | 0.78                  |
| M421         | S     | 0.49 | 2                     | 2                     | 0.78                  | 0.19                  |
| M422         | S     | 0.39 | 2                     | 2                     | 0.39                  | 0.39                  |
| CCUG 50184-T | S     | 0.32 | 3                     | 3                     | 0.19                  | 0.78                  |
| M232         | S     | 0.21 | 10                    | 2                     | 0.19                  | 0.39                  |
| M506         | I     | 0.77 | 0.4                   | 2                     | 0.15                  | 0.78                  |
| CCUG 48898-T | I     | 0.77 | 0.2                   | 0.5                   | 0.078                 | 0.19                  |
| M111         | I     | 0.78 | 0.4                   | 3                     | 0.31                  | 0.04                  |
| M353         | I     | 0.65 | 0.4                   | 3                     | 0.156                 | 0.78                  |
| M357         | I     | 1.05 | 0.6                   | 4                     | 0.625                 | 0.04                  |
| M414         | I     | 0.86 | 0.5                   | 4                     | 0.039                 | 3.125                 |
| M444         | I     | 0.85 | 0.6                   | 4                     | 0.039                 | 3.125                 |
| M505         | I     | 1.17 | 0.4                   | 4                     | 0.312                 | 1.56                  |

Fractional Inhibitory Concentration Index (FICI) values are shown as a measure of synergy. Synergy (S) is defined as  $\text{FICI} \leq 0.5$ , Indifference (I) is defined as  $0.5 < \text{FICI} \leq 4$ , and Antagonism (A) is defined as  $\text{FICI} > 4$ . *erm41* status (functional = *erm41* positive; non-functional = *erm41* negative) and phenotypic CLR susceptibility of the strains were described previously.
